# Supplementary material for: Demonstrating paths for unlocking the value of cloud genomics through cross cohort analysis
Source: PubMed Central journal article supplement (PMC10480504; doi:10.1038/s41467-023-41185-x), 2023-09-05
Supplement: 41467_2023_41185_MOESM3_ESM.pdf [file 41467_2023_41185_MOESM3_ESM.pdf]

## **Description of Additional Supplementary Files**

File Name: Supplementary Data 1

Description: Lead variants Meta-analysis: Summary statistics reported were obtained from two-sided genetic association testing performed using REGENIE and meta-analyzed using METAL.

File Name: Supplementary Data 2

Description: Lead variants Pooled: Summary statistics reported were obtained from two-sided genetic association testing performed using REGENIE.

File Name: Supplementary Data 3

Description: Number of variants in each ancestry (Percentage)
